# Supplementary material for: Yttrium-90-labeled anti-CD45 antibody followed by a reduced-intensity hematopoietic cell transplantation for patients with relapsed/refractory leukemia or myelodysplasia
Source: PubMed Central journal article supplement — Haematologica. 2019 Oct 3;105(6):1731–7. doi: 10.3324/haematol.2019.229492 (PMC7271581; doi:10.3324/haematol.2019.229492), 2020-06
Supplement: 2019.229492.VO_SUPPL.pdf [file 2019.229492.VO_SUPPL.pdf]

# Yttrium-90-labeled anti-CD45 antibody followed by a reduced-intensity hematopoietic cell transplantation for patients with relapsed/refractory leukemia or myelodysplasia

Phuong Vo,<sup>1,2</sup> Ted A. Gooley,<sup>1,2</sup> Joseph G. Rajendran,<sup>3</sup> Darrell R. Fisher,<sup>4</sup> Johnnie J. Orozco,<sup>1,2</sup> Damian J. Green,<sup>1,2</sup> Ajay K. Gopal,<sup>1,2</sup> Robyn Haaf,<sup>1</sup> Margaret Nartea,<sup>1</sup> Rainer Storb,<sup>1,2</sup> Frederick R. Appelbaum,<sup>1,2</sup> Oliver W. Press,<sup>1,2,†</sup> John M. Pagel<sup>5\*</sup> and Brenda M. Sandmaier<sup>1,2</sup>

<sup>1</sup>Division of Clinical Research, Fred Hutchinson Cancer Research Center, Seattle; <sup>2</sup>Department of Medicine, University of Washington, Seattle; <sup>3</sup>Department of Radiology, University of Washington, Seattle; <sup>4</sup>Versant Medical Physics and Radiation Safety, Richland and <sup>5</sup>Swedish Cancer Institute, Seattle, WA, USA

\*Current address: Swedish Medical Center, Seattle, WA, USA

†Posthumous.

©2020 Ferrata Storti Foundation. This is an open-access paper. doi:10.3324/haematol.2019.229492

Received: June 13, 2019.

Accepted: October 3, 2019.

Pre-published: October 3, 2019.

Correspondence: *BRENDA M. SANDMAIER* - [bsandmai@fredhutch.org](mailto:bsandmai@fredhutch.org)

---

**SUPPLEMENTARY DATA for**

**Yttrium-90-labeled Anti-CD45 Antibody followed by a Reduced-Intensity Hematopoietic Cell Transplantation for Patients with Relapsed/Refractory Leukemia or Myelodysplasia**

**Authors:** Phuong Vo<sup>1,2</sup>, Ted A. Gooley<sup>1</sup>, Joseph G. Rajendran<sup>3</sup>, Darrell R. Fisher<sup>4</sup>, Johnnie Orozco<sup>1,2</sup>, Damian J. Green<sup>1,2</sup>, Ajay K. Gopal<sup>1,2</sup>, Robyn Haaf<sup>1</sup>, Margaret Nartea<sup>1</sup>, Rainer Storb<sup>1,2</sup>, Frederick R. Appelbaum<sup>1,2</sup>, Oliver W. Press<sup>1,2,†</sup>, John M. Pagel<sup>5</sup> and Brenda M. Sandmaier<sup>1,2</sup>.

**SUPPLEMENTAL ITEM: 1 SUPPLEMENTARY TABLE**

**Supplementary Table.** <sup>90</sup>Y organ absorbed doses per unit administered activity among patients who received a therapeutic dose of <sup>90</sup>Y-DOTA-BC8.

| Dose level<br>(targeted<br>dose*, Gy) | Dose<br>level | Patient<br>number | Absorbed Dose per Administered Activity (cGy/mCi) |        |                |       |        |            |
|---------------------------------------|---------------|-------------------|---------------------------------------------------|--------|----------------|-------|--------|------------|
|                                       |               |                   | Liver                                             | Marrow | Spleen         | Lung  | Kidney | Total body |
| 1 (6)                                 | 1             | 1                 | 25                                                | 10.85  | 110            | 0.343 | 8.51   | 1.89       |
| 2 (8)                                 | 2             | 2                 | 31                                                | 19.75  | 104            | 0.142 | 8.36   | 2.08       |
| 3 (10)                                | 3             | 3                 | 31.4                                              | 19.85  | 103            | 0     | 0      | 1.82       |
| 4 (12)                                | 4             | 4                 | 21.5                                              | 1.14   | 80.8           | 0.824 | 0.824  | 1.79       |
| 5 (14)                                | 5             | 5                 | 36.8                                              | 26.55  | 188            | 1.25  | 1.25   | 3.74       |
| 6 (16)                                | 6             | 6                 | 29.7                                              | 11.6   | 0 <sup>†</sup> | 0.623 | 5.23   | 1.9        |
| 6 (16)                                | 6             | 7                 | 25.5                                              | 12.65  | 98             | 0.621 | 11.2   | 1.93       |
| 7 (18)                                | 7             | 8                 | 13.9                                              | 10.3   | 51.2           | 0     | 0      | 2.28       |
| 8 (20)                                | 8             | 9                 | 27.3                                              | 10.32  | 112            | 0.369 | 12.9   | 1.42       |
| 9 (22)                                | 9             | 10                | 15.8                                              | 27.6   | 102            | 0.233 | 3.97   | 2.99       |
| 10 (24)                               | 10            | 11                | 20.7                                              | 12.05  | 88             | 0     | 0      | 1.86       |
| 10 (24)                               | 10            | 12                | 15.6                                              | 11.05  | 56.5           | 0     | 4.29   | 2.34       |
| 11 (26)                               | 11            | 13                | 31.7                                              | 20.4   | 0 <sup>†</sup> | 68.3  | 12.1   | 1.55       |
| 12 (28)                               | 12            | 14                | 26.9                                              | 15.7   | 119            | 0     | 0      | 2.14       |
| 13 (30)                               | 13            | 15                | 27.3                                              | 9.18   | 129            | 0.59  | 16.2   | 2.48       |

\*Targeted radiation dose to normal organ receiving highest dose (liver).

<sup>†</sup>Patients with splenectomy.
